# Supplementary material
Source: publisher figshare collection journal article supplement (https://acs.figshare.com/ndownloader/files/3773317)
Supplement: Supplementary file 1 [file 3773317]

# Supporting Information : Atomistic Mechanisms for the Nucleation of Aluminium Oxide Nanoparticles

Julien Lam,<sup>\*</sup> David Amans,<sup>\*</sup> Christophe Dujardin, Gilles Ledoux, and Abdul-Rahman Allouche

*Université Lyon 1, F-69622 Villeurbanne, France, UMR5306 CNRS, Institut Lumiere Matiere, PRES-Université de Lyon, F-69361 Lyon, France*

E-mail: julien.lam@univ-lyon1.fr; david.amans@univ-lyon1.fr

## SI.1 Isomer data

For each molecular formula  $\text{Al}_x\text{O}_y$ , geometries along with point-zero energies for all the selected isomers are reported in the supplementary material attached to the Letter in a xyz format where the number of atoms and the point-zero energy [Hartree] are given in the commentary line. The positions are given in Angstrom. The name  $i\_j.xyz$  of each files denotes the molecular formula  $\text{Al}_i\text{O}_j$ .

## SI.2 Gas composition

From the dissociation energy, the vibrational and rotational constants, the Gibbs free energy of formation  $\Delta_f G_{\text{Al}_x\text{O}_y^{(i)}}$  of each  $\text{Al}_x\text{O}_y^{(i)}$  is computed as a function of the temperature (T) and the pressure ( $P_o$ ).  $i$  denotes the  $\text{Al}_x\text{O}_y$  isomer considered. For each isomer  $i$  of each  $\text{Al}_x\text{O}_y$ , the Gibbs free energy  $G$  was calculated using the electronic energy  $E_0$  (calculated at MP2/6-311++G(3df,3pd) level of theory), the entropy  $S_{total}$ , and the energy  $E_{total}$  resulting from translational, vibrational and rotational motion :

$$G = E_0 + E_{total} + RT - TS_{total}$$

---

<sup>\*</sup>To whom correspondence should be addressed

where  $R$  is the gas constant.  $S_{total}$  and  $E_{total}$  were calculated using the geometries and the harmonic frequencies computed at B3LYP/6-311+G(3df,3pd) level of theory. They are defined as follow:

$$E_{total} = E_{trans} + E_{vib} + E_{rot}$$

$$S_{total} = S_{trans} + S_{vib} + S_{rot}$$

where *trans*, *vib* and *rot* must be understood as translation, vibration and rotation. The energies were calculated as follow.  $E_{rot} = RT$  for linear molecules and  $\frac{3}{2}RT$  for non linear molecules.

$$E_{trans} = \frac{3}{2}RT$$

$$E_{vib} = R \sum_{p=0}^N \Theta_p \left( \frac{1}{2} + \frac{1}{\exp(\Theta_p/T) - 1} \right)$$

where  $\Theta_p = h\nu_p/k_B$ ,  $\nu_p$  is the harmonic frequency of mode number  $p$ ,  $N = 3 \times (\text{number of atoms}) - 5$  for linear molecules and  $3 \times (\text{number of atoms}) - 6$  for non linear molecules .

The entropy was calculated as follow:

$$S_{trans} = R \left[ \ln \left( \left( \frac{2\pi mk_B T}{h^2} \right)^{3/2} \frac{k_B T}{P_o} \right) + \frac{5}{2} \right]$$

$$S_{vib} = R \sum_{p=0}^N \left[ \frac{\Theta_p/T}{\exp(\Theta_p/T) - 1} - \ln \left( 1 - \exp\left(\frac{-\Theta_p}{T}\right) \right) \right]$$

$S_{rot} = R \left[ \ln \left( \frac{T}{\Theta_r} \right) + 1 \right]$  for linear molecules, and  $R \left[ \ln \left( \frac{1}{2} \sqrt{\frac{\pi T^3}{\Theta_{rx} \Theta_{ry} \Theta_{rz}}} \right) + \frac{3}{2} \right]$  for non linear molecules.  $\Theta_{rx} = h^2/8\pi^2 I_x k_B$  where  $I_x$  is the moment inertia with respect to x axis (respectively y and z).

From the set of  $\Delta_f G_{Al_x O_y^{(i)}}$ , we can compute the composition of a gas feed with aluminium and oxygen atoms as a function of the temperature, the initial proportion of elements ( $\lambda \equiv N_{Al}/N_O$ ) and the pressure. We considered a set of reactions which correspond to the formation of the  $Al_x O_y^{(i)}$  molecules from an atomic gas:

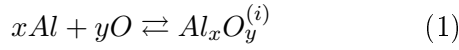

The gibbs free energy of reactions  $\Delta_r G_{Al_x O_y^{(i)}}$  are deduced from the  $\Delta_f G_{Al_x O_y^{(i)}}$ .<sup>1</sup> The composition in the equilibrium state is driven by the dissociation constants :

$$K_{Al_x O_y^{(i)}} = \frac{P_{Al_x O_y^{(i)}} P_o^{(x+y)-1}}{P_{Al}^x P_O^y} \quad (2)$$

where  $P_{Al_x O_y^{(i)}}$ ,  $P_{Al}$  and  $P_O$  are respectively the partial pressure of the  $Al_x O_y^{(i)}$  molecule, the partial pressure of aluminium atoms and the partial pressure of oxygen atoms. Each  $K_{Al_x O_y^{(i)}}$  is expressed using the Van't Hoff law:

$$K_{Al_x O_y^{(i)}} = \exp \left( - \frac{\Delta_r G_{Al_x O_y^{(i)}}(T, P_o)}{k_B T} \right) \quad (3)$$

Assuming a perfect gas, we define the quantities  $P_{Al}^{tot}$  and  $P_O^{tot}$  which respectively map the total number of aluminium atoms and oxygen atoms:

$$\begin{aligned} P_{Al}^{tot} &= \sum_{x,y,i} x P_{Al_x O_y^{(i)}} \\ &= \sum_{x,y,i} x K_{Al_x O_y^{(i)}} P_{Al}^x P_O^y P_o^{1-(x+y)} \\ P_O^{tot} &= \sum_{x,y,i} y P_{Al_x O_y^{(i)}} \\ &= \sum_{x,y,i} y K_{Al_x O_y^{(i)}} P_{Al}^x P_O^y P_o^{1-(x+y)} \end{aligned} \quad (4)$$

The proportion of elements follows the ratio  $\lambda = P_{Al}^{tot}/P_O^{tot}$ . The mass conservation leads to  $P_o = P_{Al}^{tot} + P_O^{tot}$ . As a consequence, each  $(P_o, \lambda)$  pair defines the quantities  $P_{Al}^{tot}$  and  $P_O^{tot}$ . The set of

equations (4) is then solved numerically to obtain the partial pressures  $P_{Al}$  and the  $P_O$ . Finally, the partial pressures of all  $Al_x O_y^{(i)}$  molecules composing the system are calculated from the equation (2).

### SI.3 Calculation of $\lambda_{min}$

Assuming an  $\alpha$ - $Al_2O_3$  density of  $3.95 \text{ g.cm}^{-3}$ , a molar mass of  $101.96 \text{ g.mol}^{-1}$ , we have obtained  $7 \times 10^{15} \pm 70\%$  atoms ablated per pulse. Considering the size of the plasma, 2 mm in diameter,<sup>2</sup> and assuming an ideal gas, the number of  $O_2$  molecules provided by the air is  $2 \times 10^{16}$ .  $\lambda_{min}$  corresponds to the ratio between the number of aluminium atoms provided by the target and the number of oxygen atoms provided by the target and the air.

$$\lambda_{min} = \frac{2/5 \times 7 \times 10^{15}}{3/5 \times 7 \times 10^{15} + 2 \times 2 \times 10^{16}} = 0.063$$

### SI.4 Fit of the ration $N_{AlO}/N_{Al}$

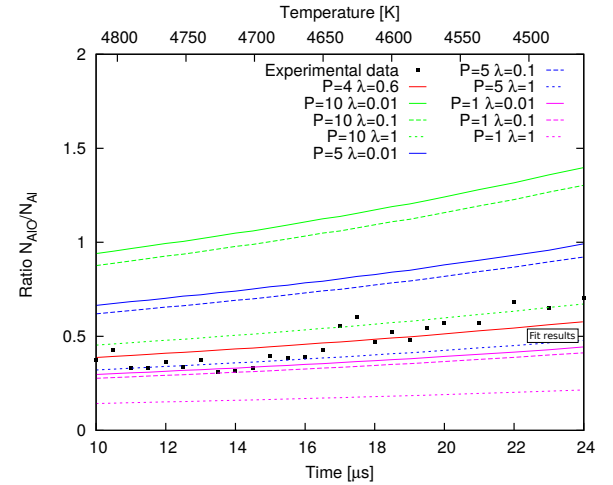

Figure 1: Comparison between the experimental measurements (black dots) and the numerical calculations for different values of  $\lambda$  and  $P_o$  at short time scale (10  $\mu$ s - 24  $\mu$ s).

In figure 1, corrected experimental measurements are plotted along with several theoretical curves in order to assess the quality of agreement between experimental measurements and theoretical calculations.

## SI.5 Ratio (2:3)/(1:1)

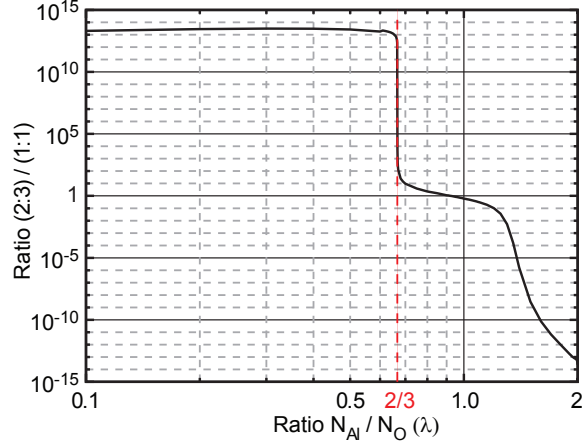

Figure 2: Ratio in pressure between molecules following  $(\text{Al}_2\text{O}_3)_n$  and those following  $(\text{AlO})_n$  as a function of  $\lambda$  calculated at 1500 K.

Figure 2 shows the ratio in pressure between molecules following  $(\text{Al}_2\text{O}_3)_n$  and those following  $(\text{AlO})_n$  as a function of  $\lambda$ . The plateau observed for  $\lambda < 2/3$  corresponds to the numerical error.

## References

- (1) McQuarrie, D. A.; Simon, J. D. *Molecular Thermodynamics*; University Science Books, 1999.
- (2) Lam, J.; Motto-Ros, V.; Misiak, D.; Dujardin, C.; Ledoux, G.; Amans, D. Investigation of Local Thermodynamic Equilibrium in Laser-Induced Plasmas: Measurements of Rotational and Excitation Temperatures at Long Time Scales. *Spectroc. Acta Pt. B* **2014**, *101*, 86–92.
